# Supplementary material for: Outstanding effects on antithrombin activity of modified TBA diastereomers containing an optically pure acyclic nucleotide analogue
Source: Royal Society of Chemistry journal article supplement (doi:10.1039/c4ob00149d), 2014-01-01
Supplement: c4ob00149d1.pdf [file c4ob00149d1.pdf]

Electronic Supplementary Information

**Outstanding effects on antithrombin activity of modified TBA diastereomers containing an optically pure acyclic nucleotide analogue**

Maria Scuotto,<sup>‡</sup> Marco Persico,<sup>‡</sup> Maria-Rosaria Bucci, Valentina Vellecco, Nicola Borbone, Elena Morelli, Giorgia Oliviero, Ettore Novellino, Gennaro Piccialli, Giuseppe Cirino, Michela Varra,\* Caterina Fattorusso\* and Luciano Mayol

*Dipartimento di Farmacia, via D. Montesano 49, 80131 Napoli, Italy*

**Table of Contents**

|                                                                                                                               |            |
|-------------------------------------------------------------------------------------------------------------------------------|------------|
| <b>Figure S1.</b> CD melting curves of TBA and modified ONs.                                                                  | <b>S2</b>  |
| <b>Figure S2.</b> Example of spectroscopic measurement of scattering produced by fibrinogen clotting.                         | <b>S3</b>  |
| <b>Figure S3.</b> Binding modes I and II of TBA-S <sub>7</sub> and TBA-R <sub>7</sub> .                                       | <b>S4</b>  |
| <b>Table S1.</b> Calculated occurrence rates of conformers presenting TGT and TT nucleobases “stacked” on the guanine planes. | <b>S5</b>  |
| <b>Table S2.</b> Calculated occurrence rates of syn, anti, and s/a conformers of TGT and TT glycosidic bonds.                 | <b>S6</b>  |
| <b>Figure S4.</b> <sup>1</sup> H NMR S-c                                                                                      | <b>S7</b>  |
| <b>Figure S5.</b> <sup>13</sup> C-NMR S-c                                                                                     | <b>S8</b>  |
| <b>Figure S6.</b> <sup>1</sup> H NMR R-c                                                                                      | <b>S9</b>  |
| <b>Figure S7.</b> <sup>13</sup> C-NMR R-c                                                                                     | <b>S10</b> |
| <b>Figure S8.</b> <sup>1</sup> H NMR 5a                                                                                       | <b>S11</b> |
| <b>Figure S9.</b> <sup>1</sup> H NMR 5b                                                                                       | <b>S12</b> |
| <b>Figure S10.</b> <sup>13</sup> C NMR 5a                                                                                     | <b>S13</b> |
| <b>Figure S11.</b> <sup>13</sup> C NMR 5b                                                                                     | <b>S14</b> |
| <b>Figure S12.</b> <sup>31</sup> P NMR 5a                                                                                     | <b>S15</b> |
| <b>Figure S13.</b> <sup>31</sup> P NMR 5b                                                                                     | <b>S16</b> |
| <b>Figure S14.</b> HPLC chromatogram 5a                                                                                       | <b>S17</b> |
| <b>Figure S15.</b> HPLC chromatogram 5b                                                                                       | <b>S18</b> |
| <b>Figure S16.</b> HRMS 5a                                                                                                    | <b>S19</b> |
| <b>Figure S17.</b> HRMS 5b                                                                                                    | <b>S20</b> |

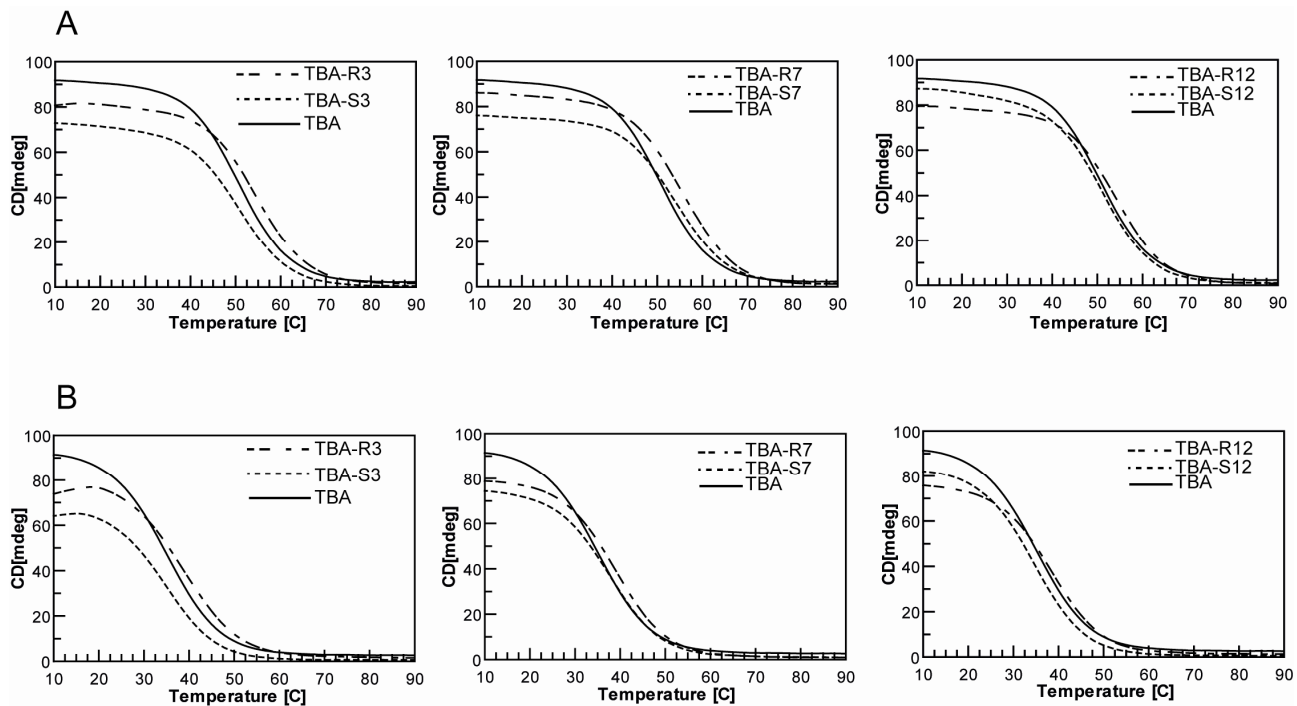

**Figure S1.** CD melting curves from 10 to 90 °C of TBA and modified ONs in K<sup>+</sup> phosphate buffer (A) and PBS (B). The temperature scan rate was 1.0 °C /min.

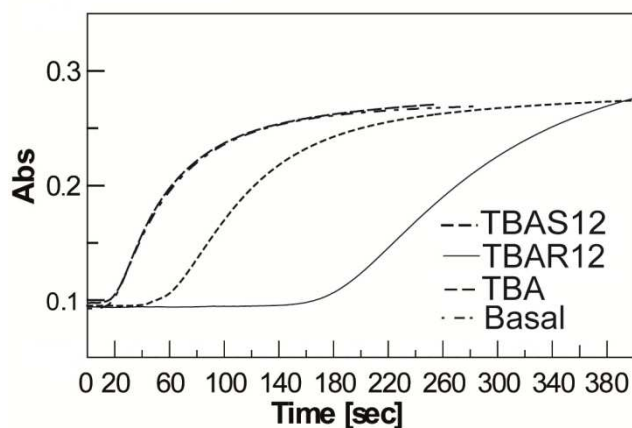

**Figure S2.** One example of spectroscopic measurement of the scattering produced by the fibrinogen clotting. The curves were obtained measuring, as a function of the time, the UV scattering caused by fibrin polymerization. 1.0 mL of fibrinogen (2 mg/1 mL) in PBS solution was incubated for 1 min with 20 nM of each ON and clot formation was triggered by addition of 1.0 NIH of human thrombin. The basal curves was registered starting the polymerization reaction in absence of any inhibitor. Wavelength was fixed at 380 nm.

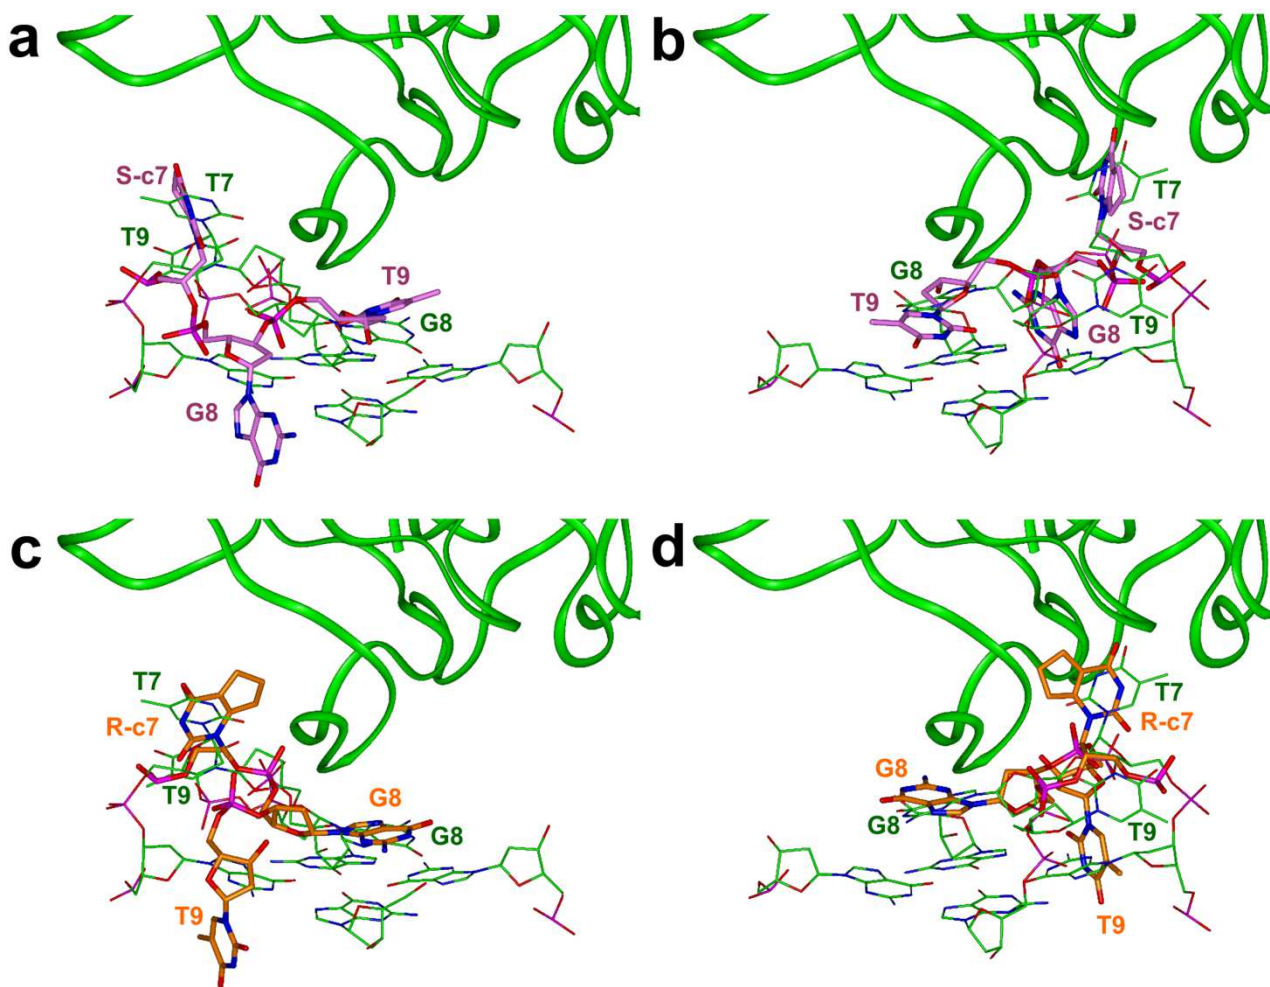

**Figure S3.** (a; binding mode I) and (b; binding mode II): TBA-S<sub>7</sub> (carbons = pink) superimposed on the bioactive conformation of TBA in complex with thrombin (carbons = green; PDB ID: 1HAP). (c; binding mode I) and (d; binding mode II): TBA-R<sub>7</sub> (carbons = orange) superimposed on the bioactive conformation of TBA (carbons = green; PDB ID: 1HAP). Heteroatoms are coloured as follows: O = red; N = blue; P = magenta. Thrombin ABE I is shown as green ribbon.

**Table S1.** Calculated occurrence rates (%) of conformers presenting TGT and TT nucleobases “stacked” on the guanine planes.

|                  | TBA <sup>a</sup> | TBA-S <sub>3</sub> | TBA-R <sub>3</sub> | TBA-S <sub>7</sub> | TBA-R <sub>7</sub> | TBA-S <sub>12</sub> | TBA-R <sub>12</sub> |
|------------------|------------------|--------------------|--------------------|--------------------|--------------------|---------------------|---------------------|
| T3 <sup>b</sup>  | 62.5             | 38.0               | 32.5               | 22.5               | 47.0               | 46.5                | 43.0                |
| T4               | 46.0             | 43.5               | 68.0               | 55.0               | 48.0               | 52.5                | 41.0                |
| T7 <sup>c</sup>  | 14.0             | 20.0               | 6.50               | 18.0               | 23.5               | 20.5                | 12.5                |
| G8               | 78.5             | 67.5               | 74.5               | 46.0               | 62.0               | 59.0                | 61.0                |
| T9               | 26.0             | 33.0               | 40.5               | 63.5               | 38.0               | 36.5                | 42.5                |
| T12 <sup>d</sup> | 33.5             | 37.5               | 29.5               | 25.0               | 18.5               | 18.5                | 28.5                |
| T13              | 38.0             | 55.5               | 57.0               | 79.5               | 69.5               | 65.5                | 59.5                |

<sup>a</sup> Data from reference 17. <sup>b</sup> T3 residue in TBA-S<sub>3</sub> and in TBA-R<sub>3</sub> is replaced by the acyclic nucleoside **c** (**S-c** and **R-c**, respectively). <sup>c</sup> T7 residue in TBA-S<sub>7</sub> and in TBA-R<sub>7</sub> is replaced by the acyclic nucleoside **c** (**S-c** and **R-c**, respectively). <sup>d</sup> T12 residue in TBA-S<sub>12</sub> and TBA-R<sub>12</sub> is replaced by the acyclic nucleoside **c** (**S-c** and **R-c**, respectively).

**Table S2.** Calculated occurrence rates (%) of *syn*, *anti*, and *s/a* conformers of TGT and TT glycosidic bonds.

|                  | TBA <sup>a</sup> |             | TBA-S <sub>3</sub> |            | TBA-R <sub>3</sub> |            | TBA-S <sub>7</sub> |             | TBA-R <sub>7</sub> |            | TBA-S <sub>12</sub> |            | TBA-R <sub>12</sub> |             |            |      |      |      |      |      |      |   |
|------------------|------------------|-------------|--------------------|------------|--------------------|------------|--------------------|-------------|--------------------|------------|---------------------|------------|---------------------|-------------|------------|------|------|------|------|------|------|---|
|                  | <i>syn</i>       | <i>anti</i> | <i>s/a</i>         | <i>syn</i> | <i>anti</i>        | <i>s/a</i> | <i>syn</i>         | <i>anti</i> | <i>s/a</i>         | <i>syn</i> | <i>anti</i>         | <i>s/a</i> | <i>syn</i>          | <i>anti</i> | <i>s/a</i> |      |      |      |      |      |      |   |
| T3 <sup>b</sup>  | 28.5             | 69.5        | 2.00               | -          | -                  | -          | 37.5               | 59.0        | 3.50               | 40.5       | 57.0                | 2.50       | 47.0                | 50.0        | 3.00       | 32.0 | 65.0 | 3.00 |      |      |      |   |
| T4               | 38.5             | 56.0        | 5.50               | 45.0       | 52.0               | 3.00       | 35.5               | 61.5        | 3.00               | 37.0       | 59.0                | 4.00       | 40.5                | 54.0        | 5.50       | 38.5 | 60.5 | 1.00 |      |      |      |   |
| T7 <sup>c</sup>  | 39.0             | 59.5        | 1.50               | 36.0       | 59.5               | 4.50       | 47.0               | 51.0        | 2.00               | -          | -                   | -          | 36.0                | 61.5        | 2.50       | 38.5 | 61.0 | 0.50 |      |      |      |   |
| G8               | 39.5             | 38.0        | 22.5               | 29.5       | 42.0               | 28.5       | 34.5               | 43.5        | 22.0               | 30.5       | 50.5                | 19.0       | 31.0                | 45.0        | 24.0       | 39.5 | 35.5 | 25.0 | 41.0 | 37.5 | 21.5 |   |
| T9               | 41.5             | 50.0        | 8.50               | 43.0       | 50.5               | 6.50       | 36.5               | 55.0        | 8.50               | 34.5       | 58.0                | 7.50       | 37.0                | 53.5        | 9.50       | 33.5 | 60.0 | 6.50 | 38.5 | 53.0 | 8.50 |   |
| T12 <sup>d</sup> | 32.0             | 66.0        | 2.00               | 40.5       | 56.5               | 3.00       | 47.0               | 51.5        | 1.50               | 28.5       | 71.0                | 0.50       | 35.5                | 64.0        | 0.50       | -    | -    | -    | -    | -    | -    | - |
| T13              | 37.0             | 59.0        | 4.00               | 37.0       | 57.0               | 6.00       | 45.5               | 49.0        | 5.50               | 45.0       | 52.0                | 3.00       | 50.0                | 45.5        | 53.5       | 41.5 | 5.00 | 54.5 | 43.0 | 2.50 |      |   |

<sup>a</sup>Data from reference 17. <sup>b</sup>T3 residue in TBA-S<sub>3</sub> and in TBA-R<sub>3</sub> is replaced by the acyclic nucleoside **c** (**S-c** and **R-c**, respectively). <sup>c</sup>T7 residue in TBA-S<sub>7</sub> and in TBA-R<sub>7</sub> is replaced by the acyclic nucleoside **c** (**S-c** and **R-c**, respectively). <sup>d</sup>T12 residue in TBA-S<sub>12c</sub> and TBA-R<sub>12c</sub> is replaced by the acyclic nucleoside **c** (**S-c** and **R-c**, respectively).

Figure S4  $^1\text{H}$  NMR S-c ( Py-D5, 400 MHz)

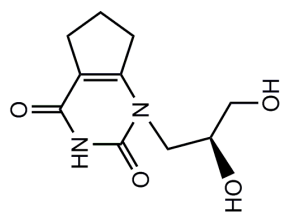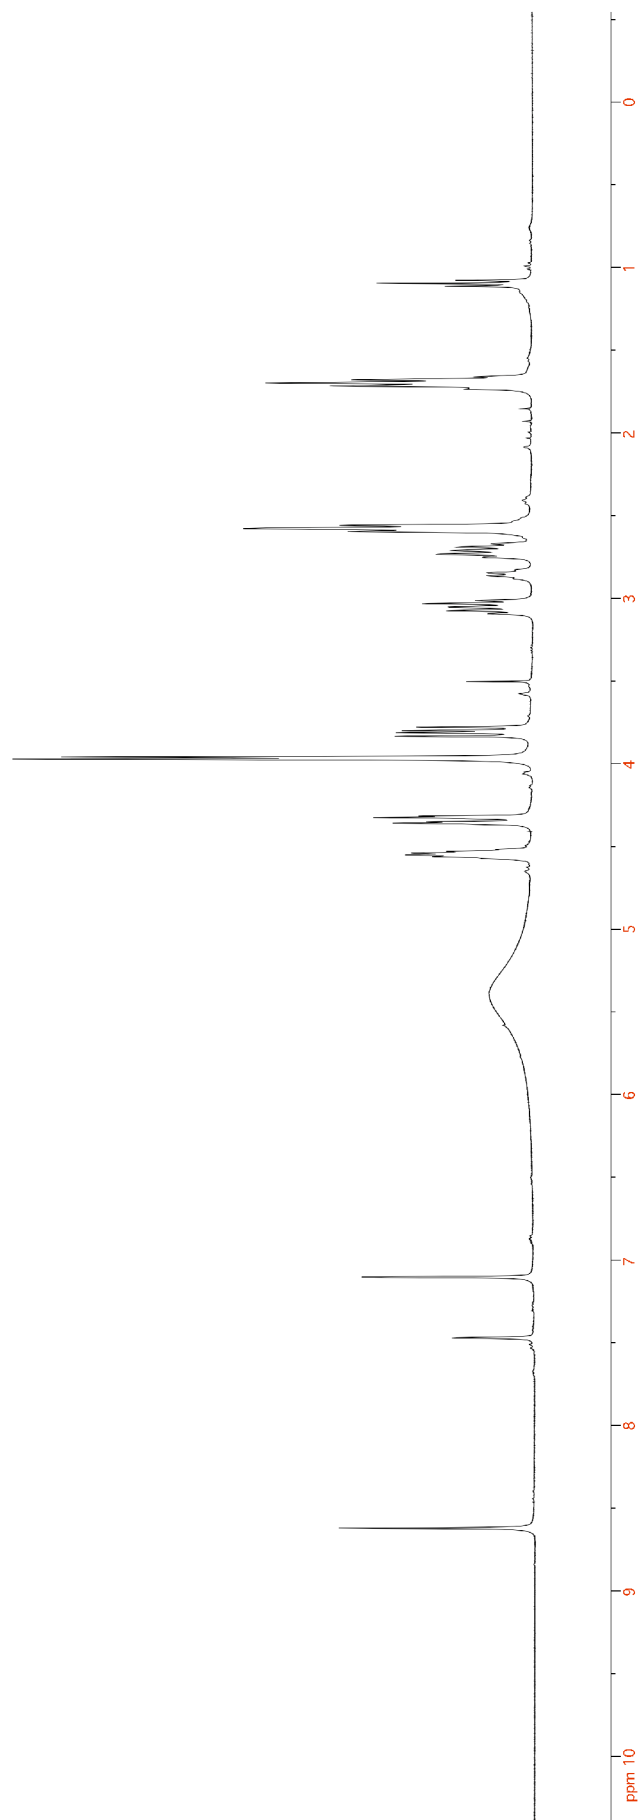

Figure S4 <sup>1</sup>H NMR S-c (Py-D5, 400 MHz)

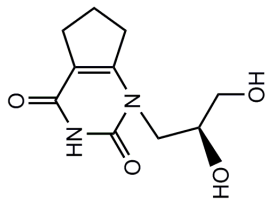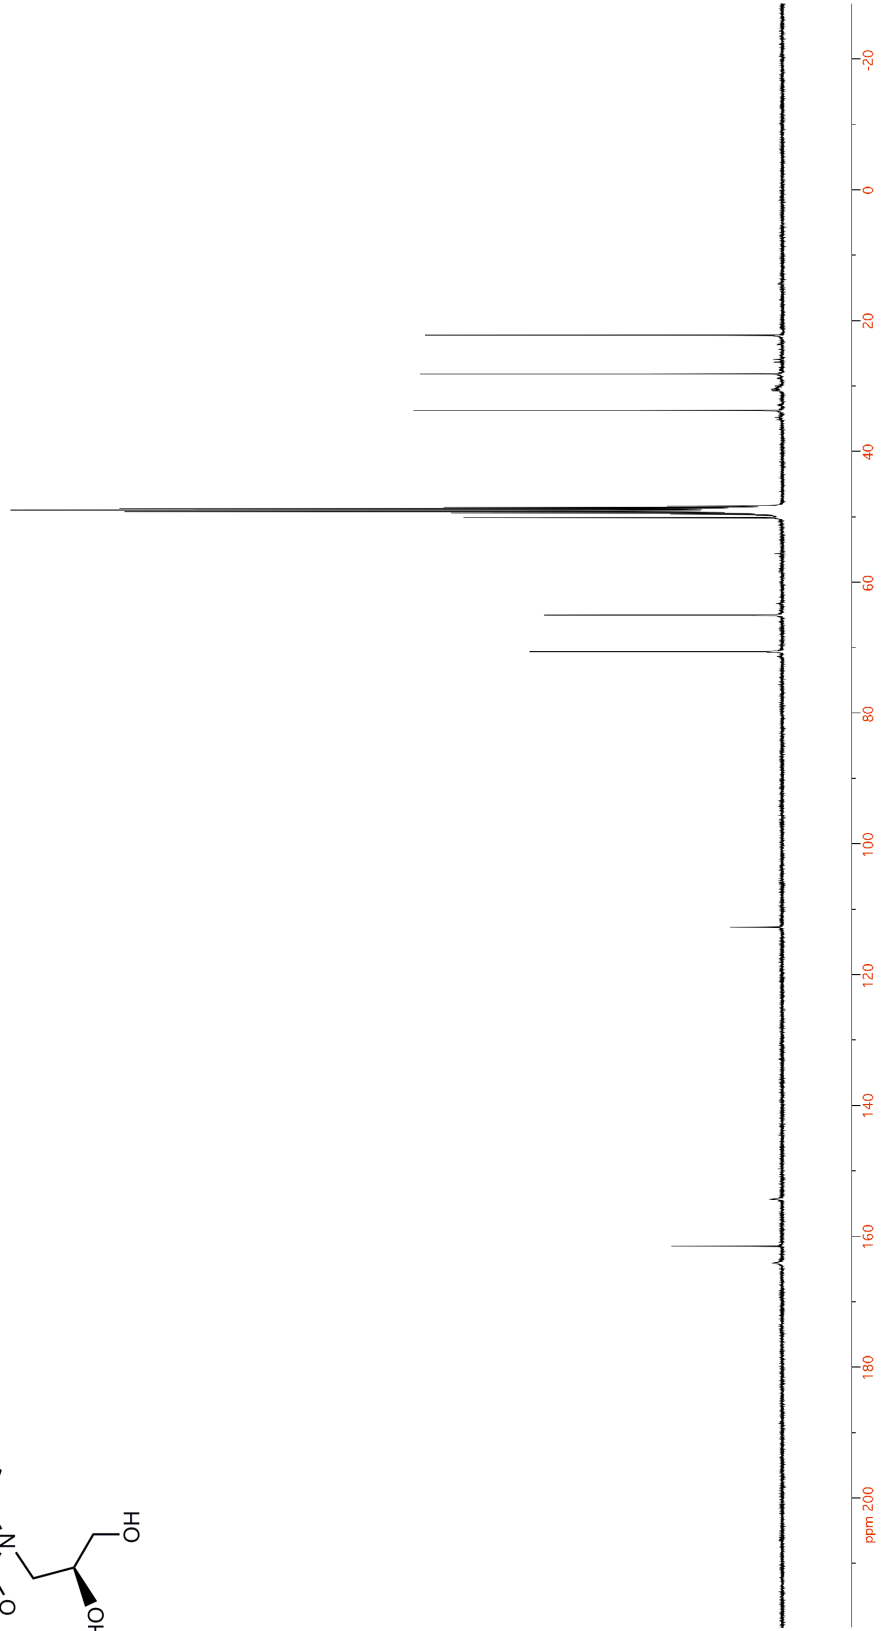



**Figure S 6:**  $^1\text{H}$  NMR **R-c** (Py-D5, 400 MHz)

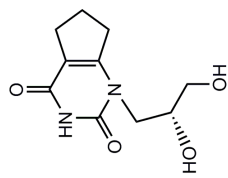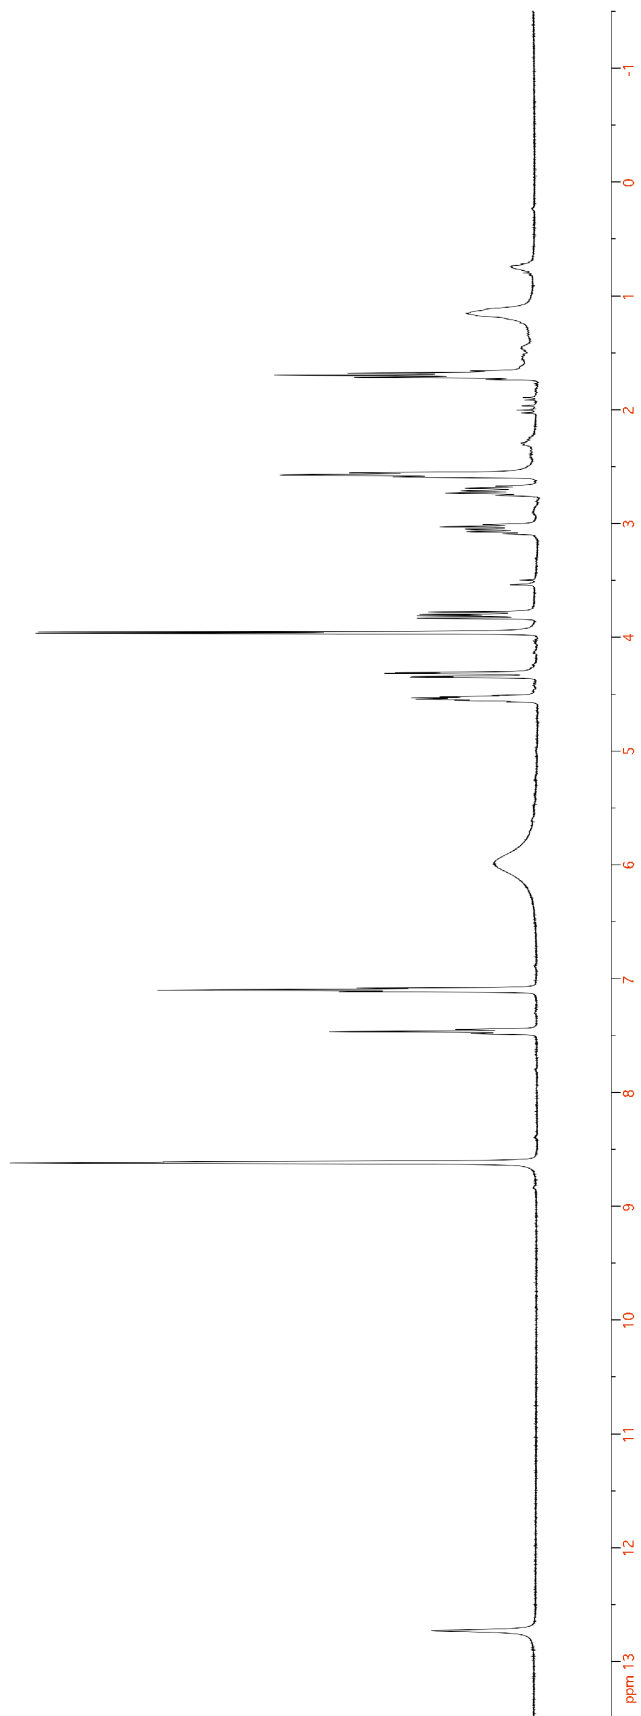

Figure S7  $^{13}\text{C}$  NMR R-c (  $\text{CD}_3\text{OD}$ , 100 MHz)

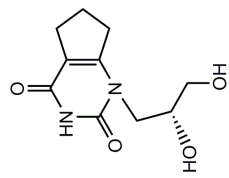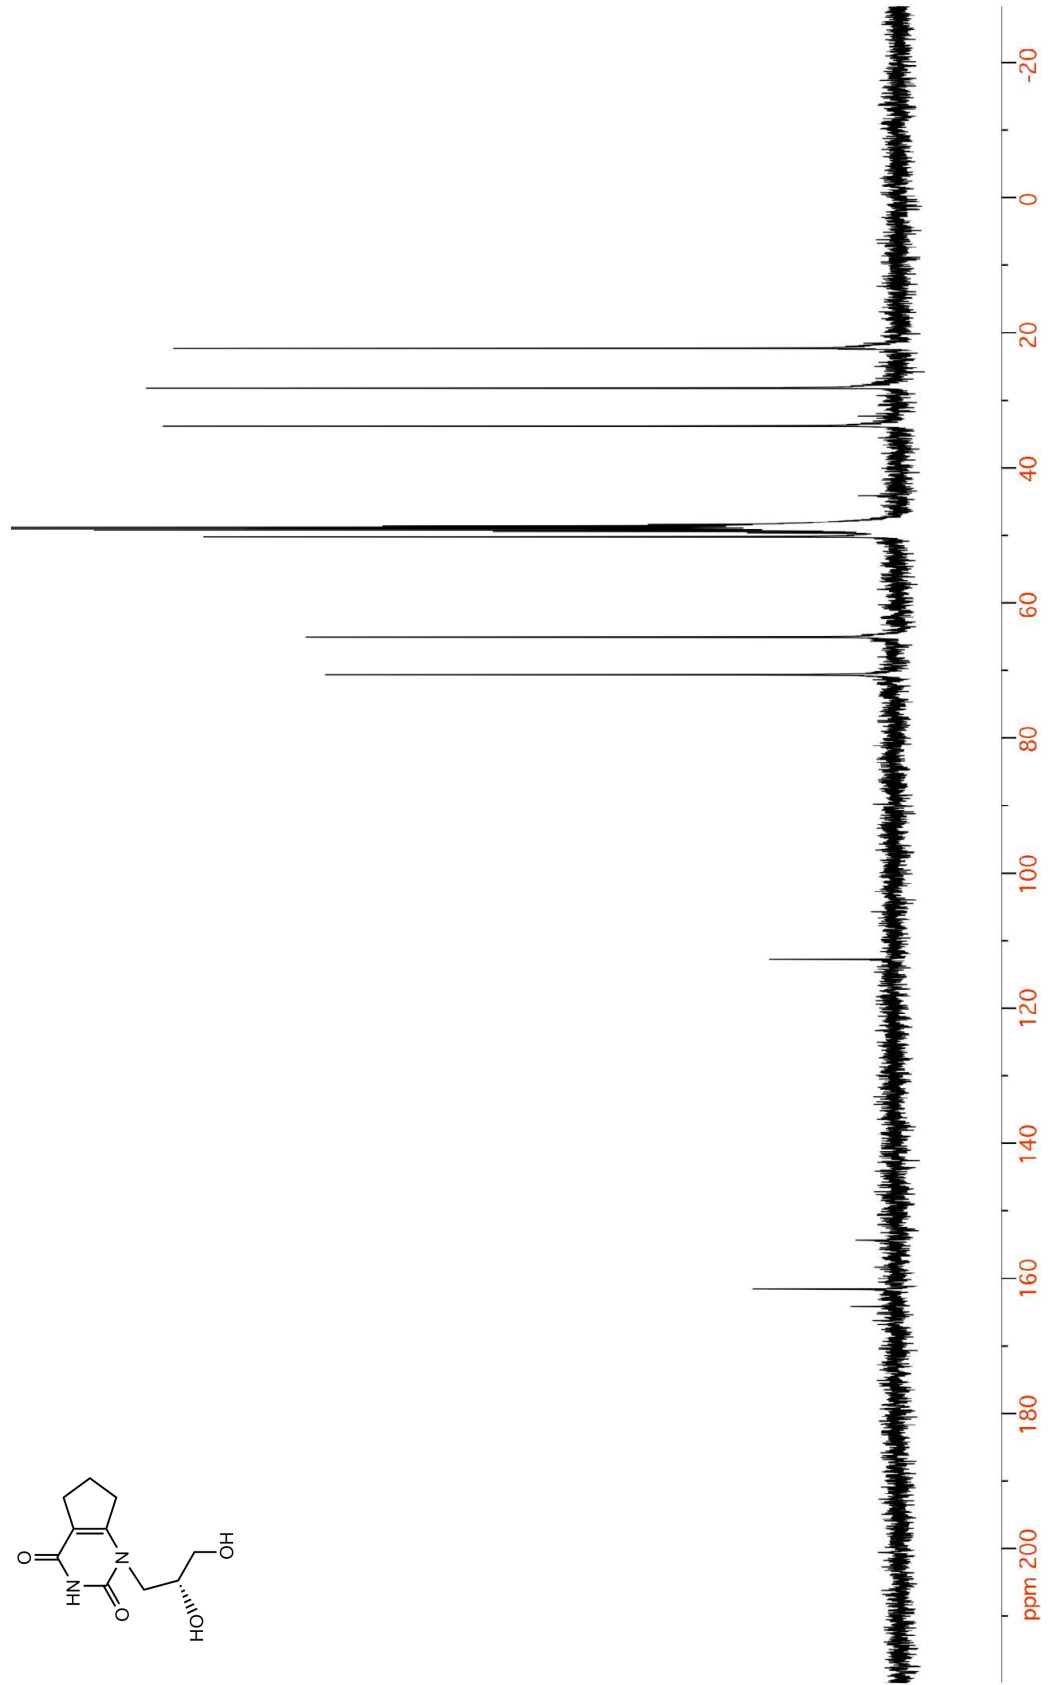

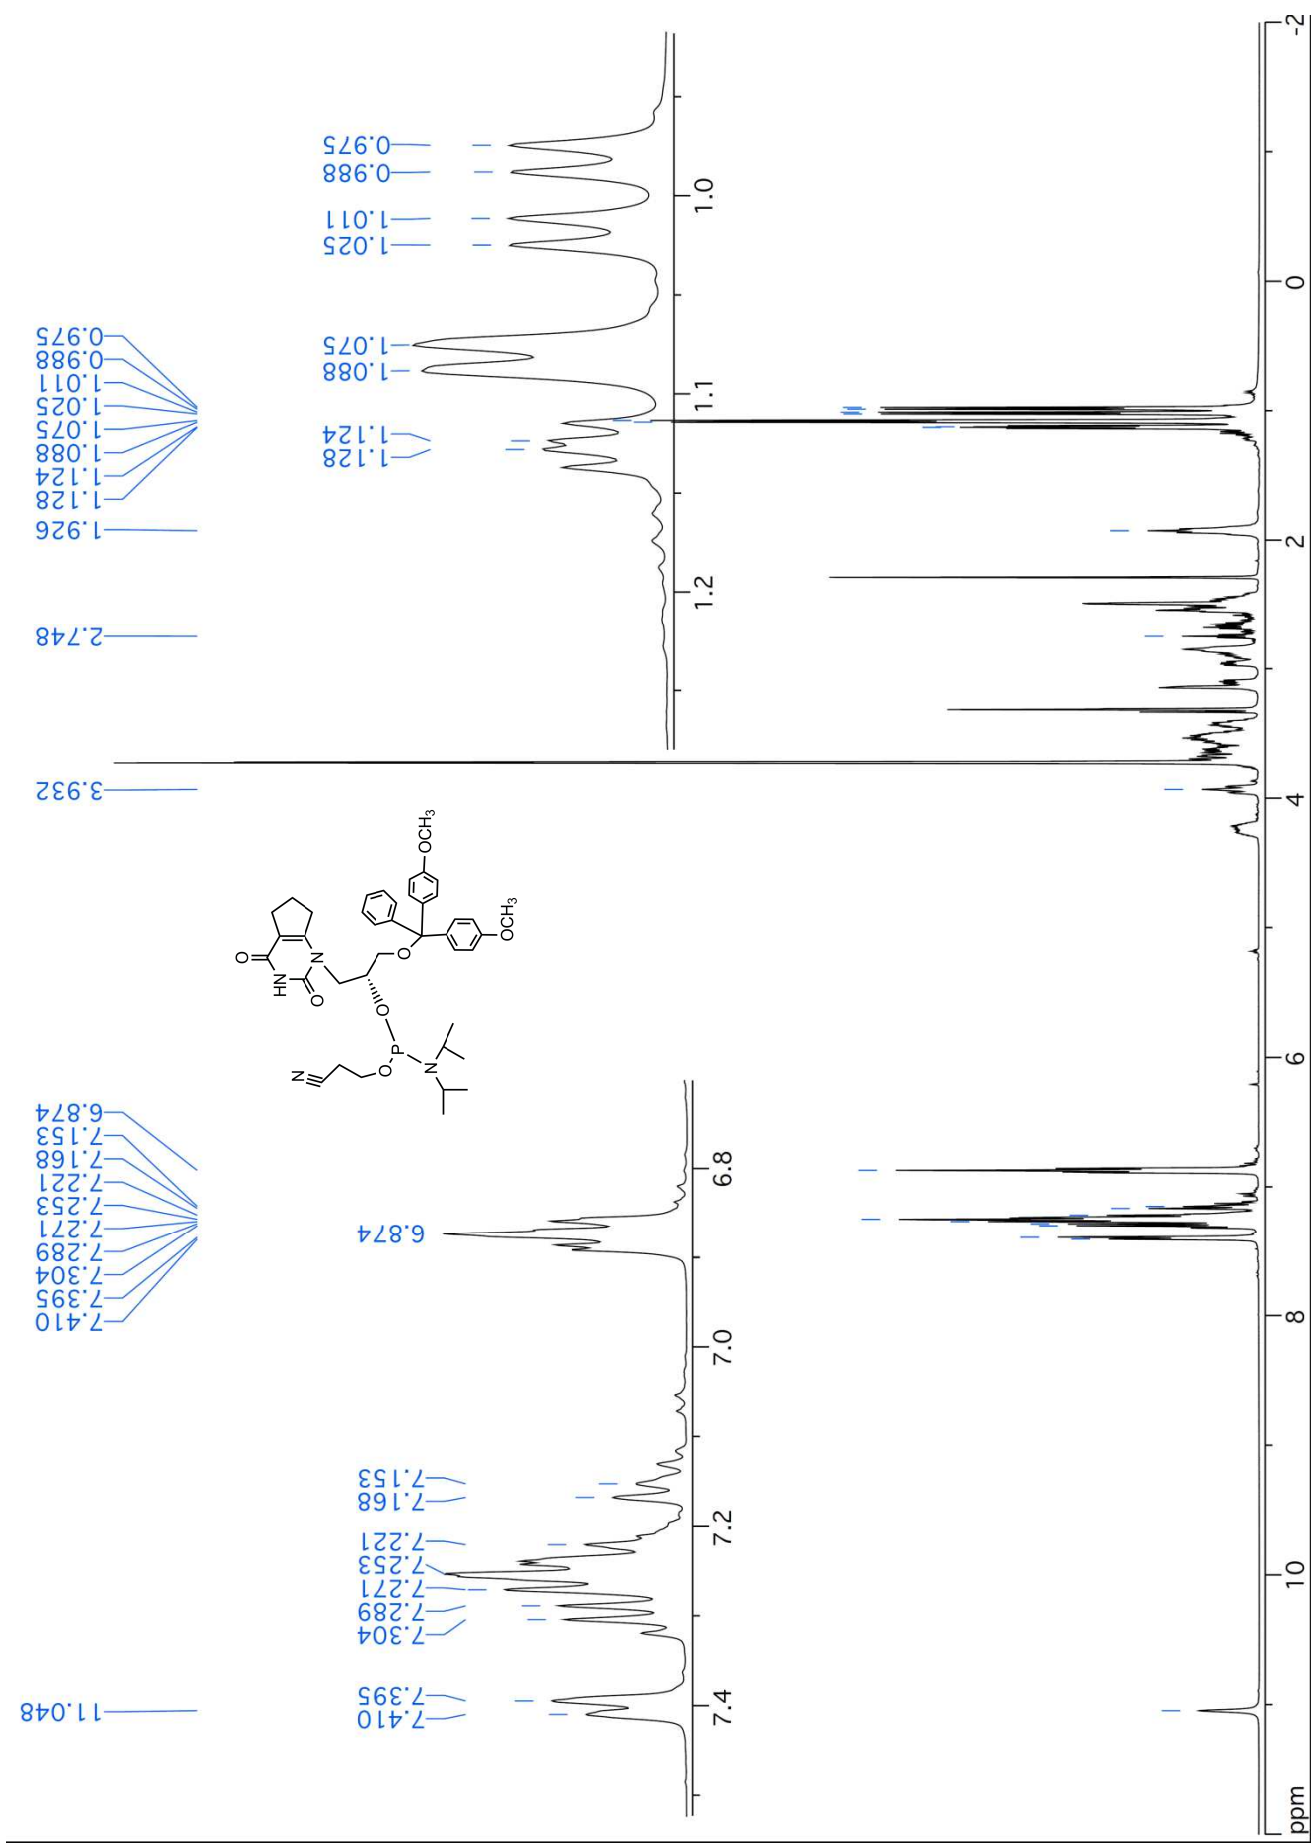

Figure S8: <sup>1</sup>H NMR 5a (DMSO-D<sub>6</sub>, 500Mz)

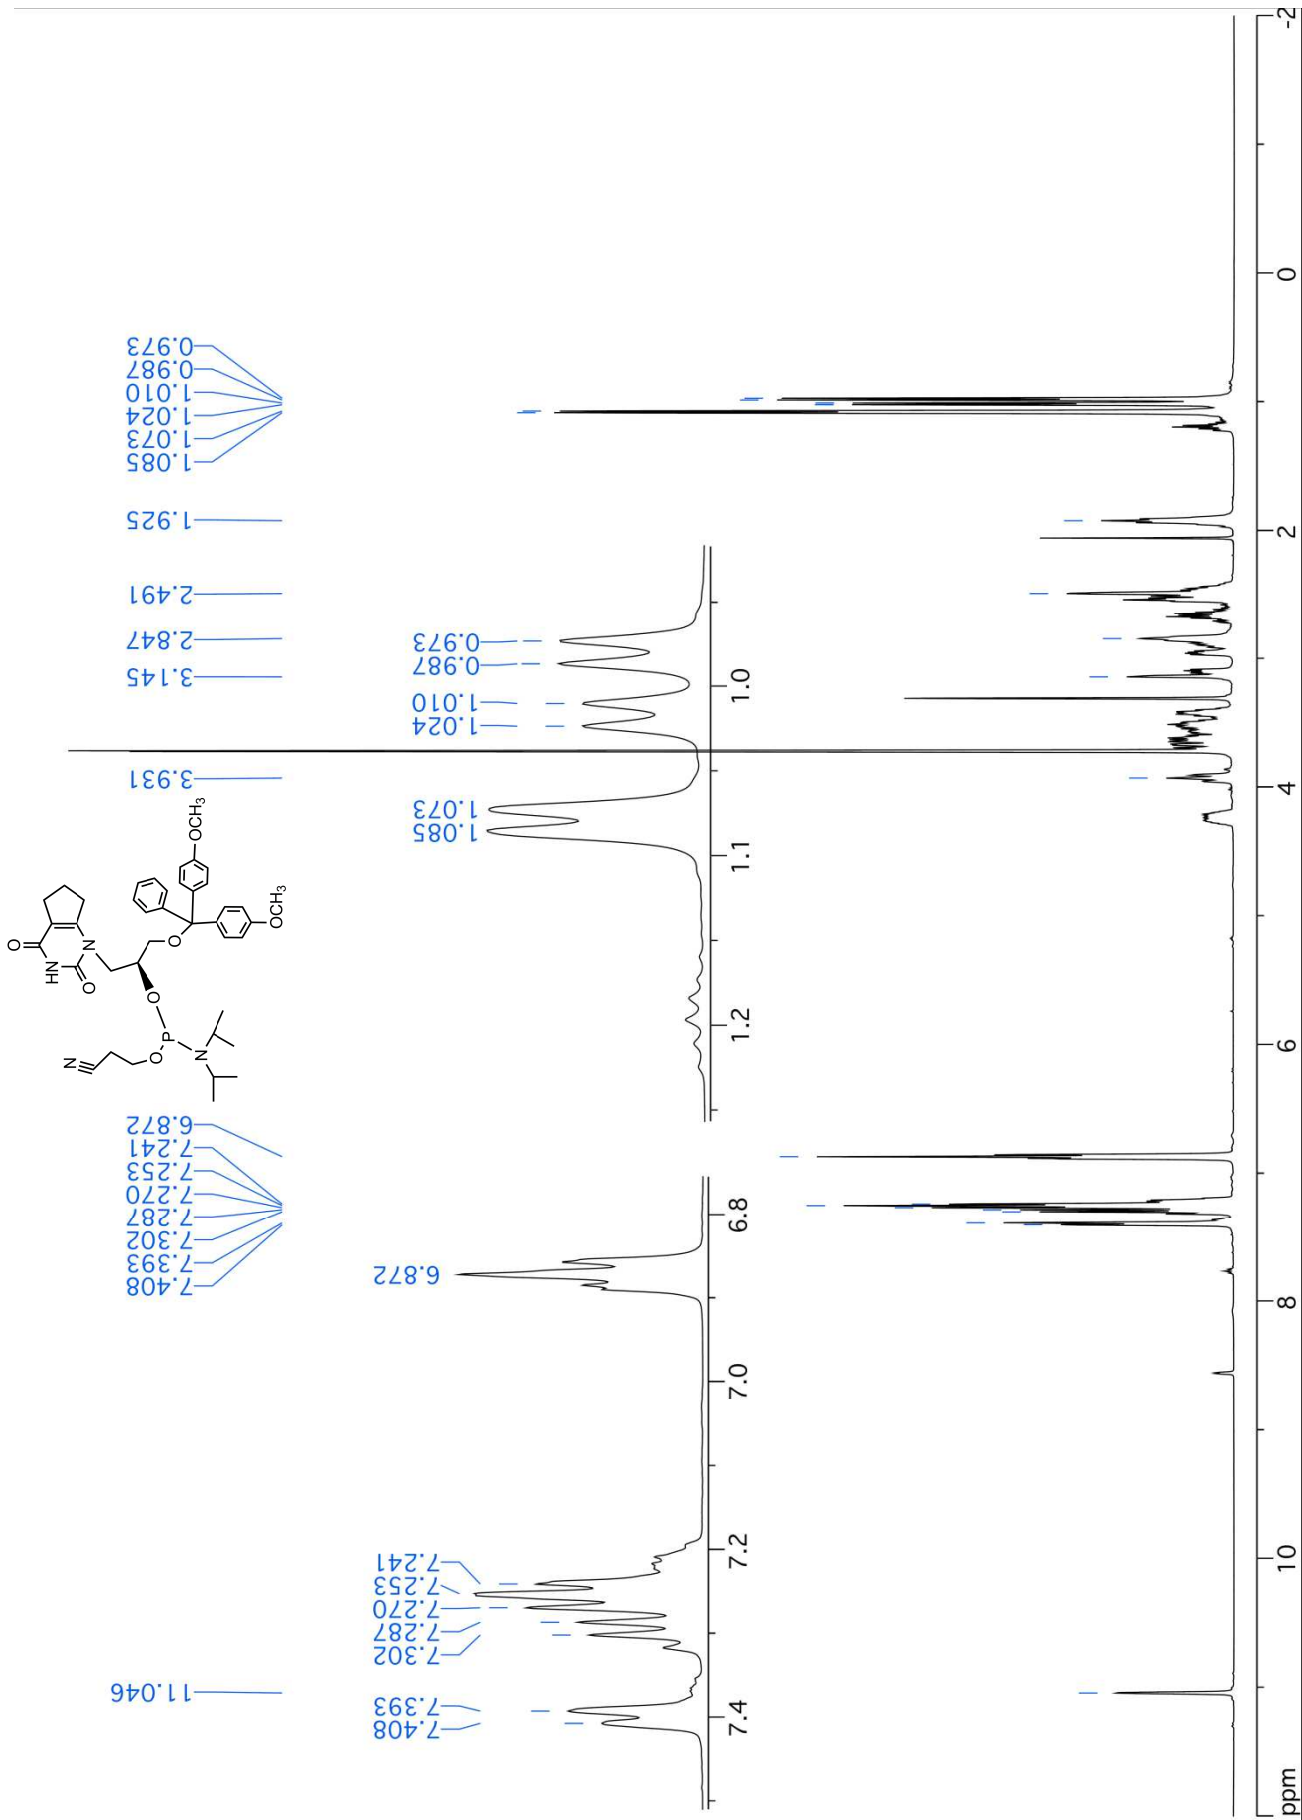

Figure S9: <sup>1</sup>H NMR **5b** (DMSO-D<sub>6</sub>, 500Mz)

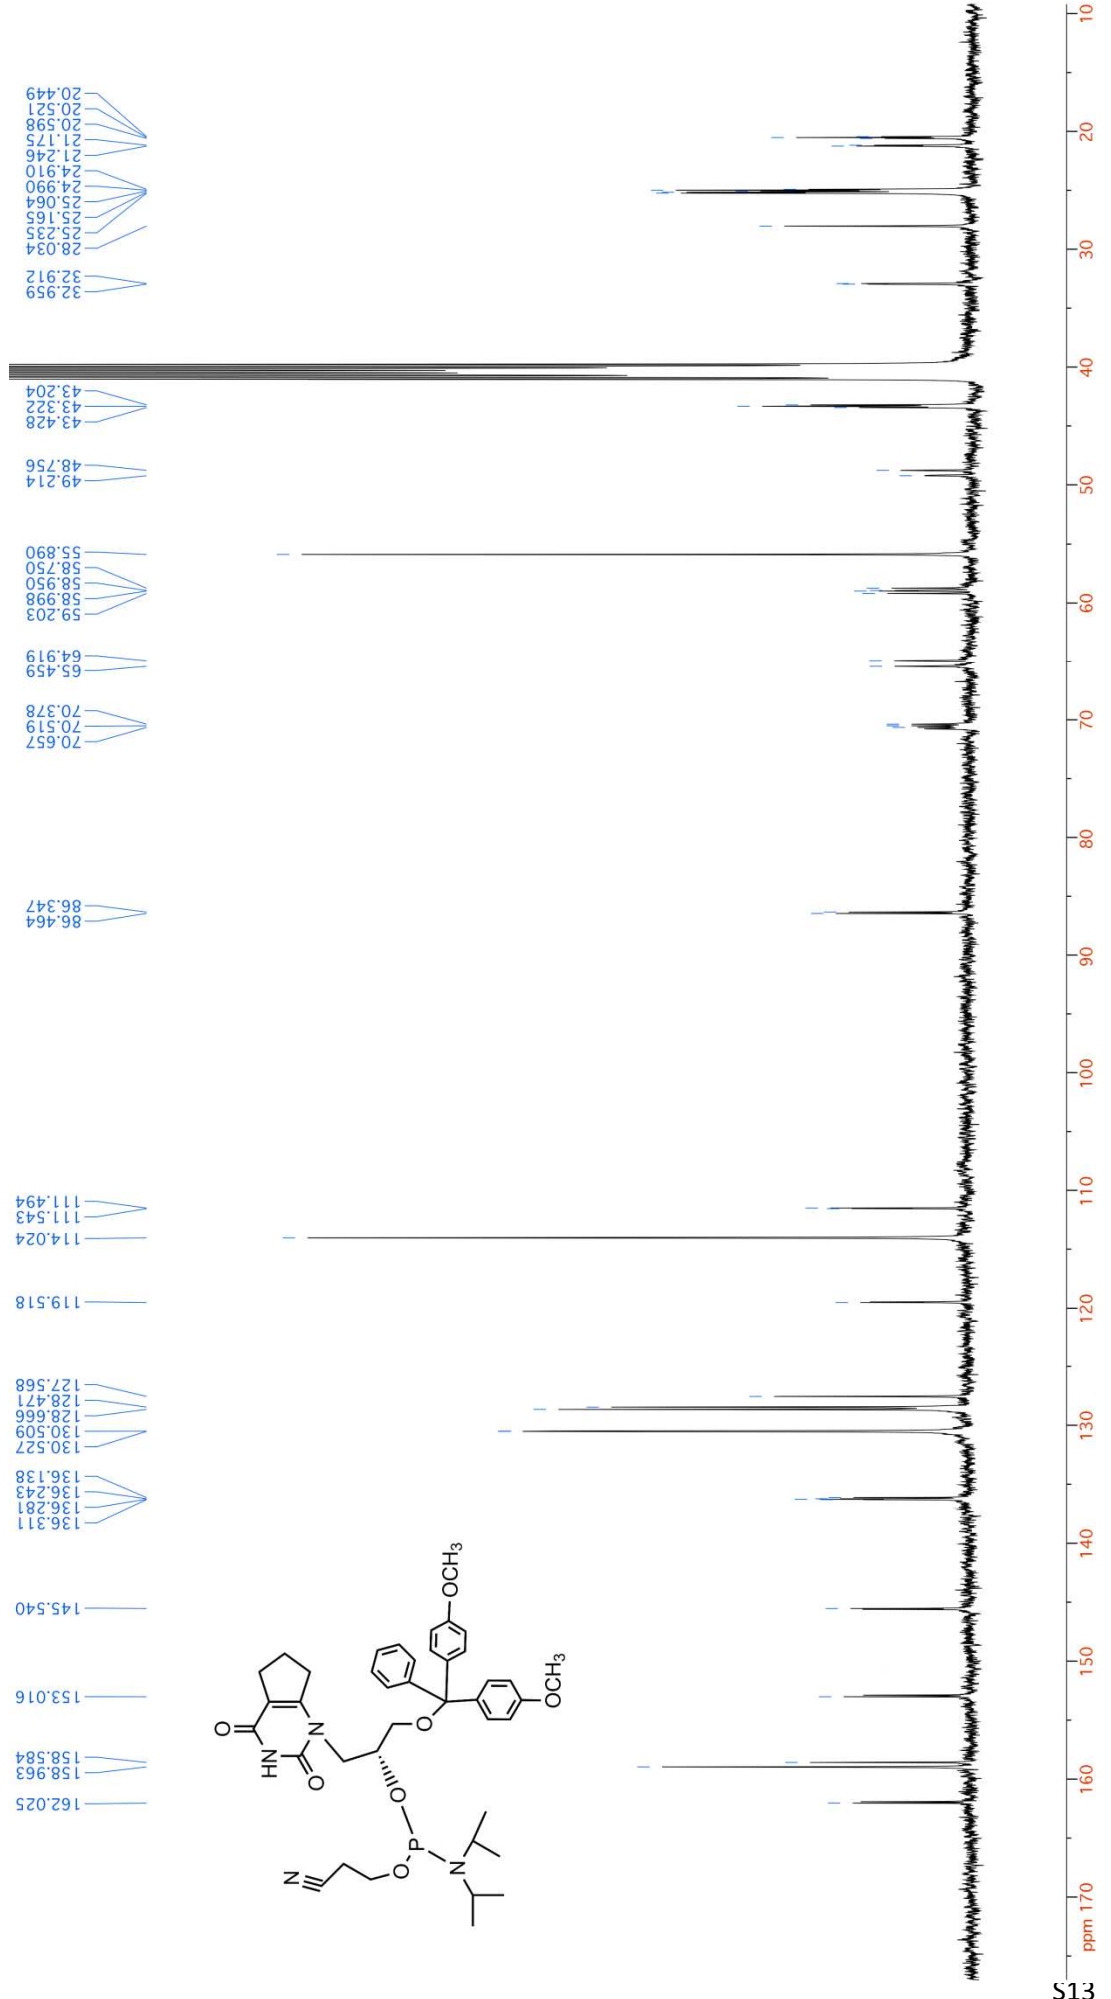

Figure S10: <sup>13</sup>C NMR 5a (DMSO-D<sub>6</sub>, 100MHz)

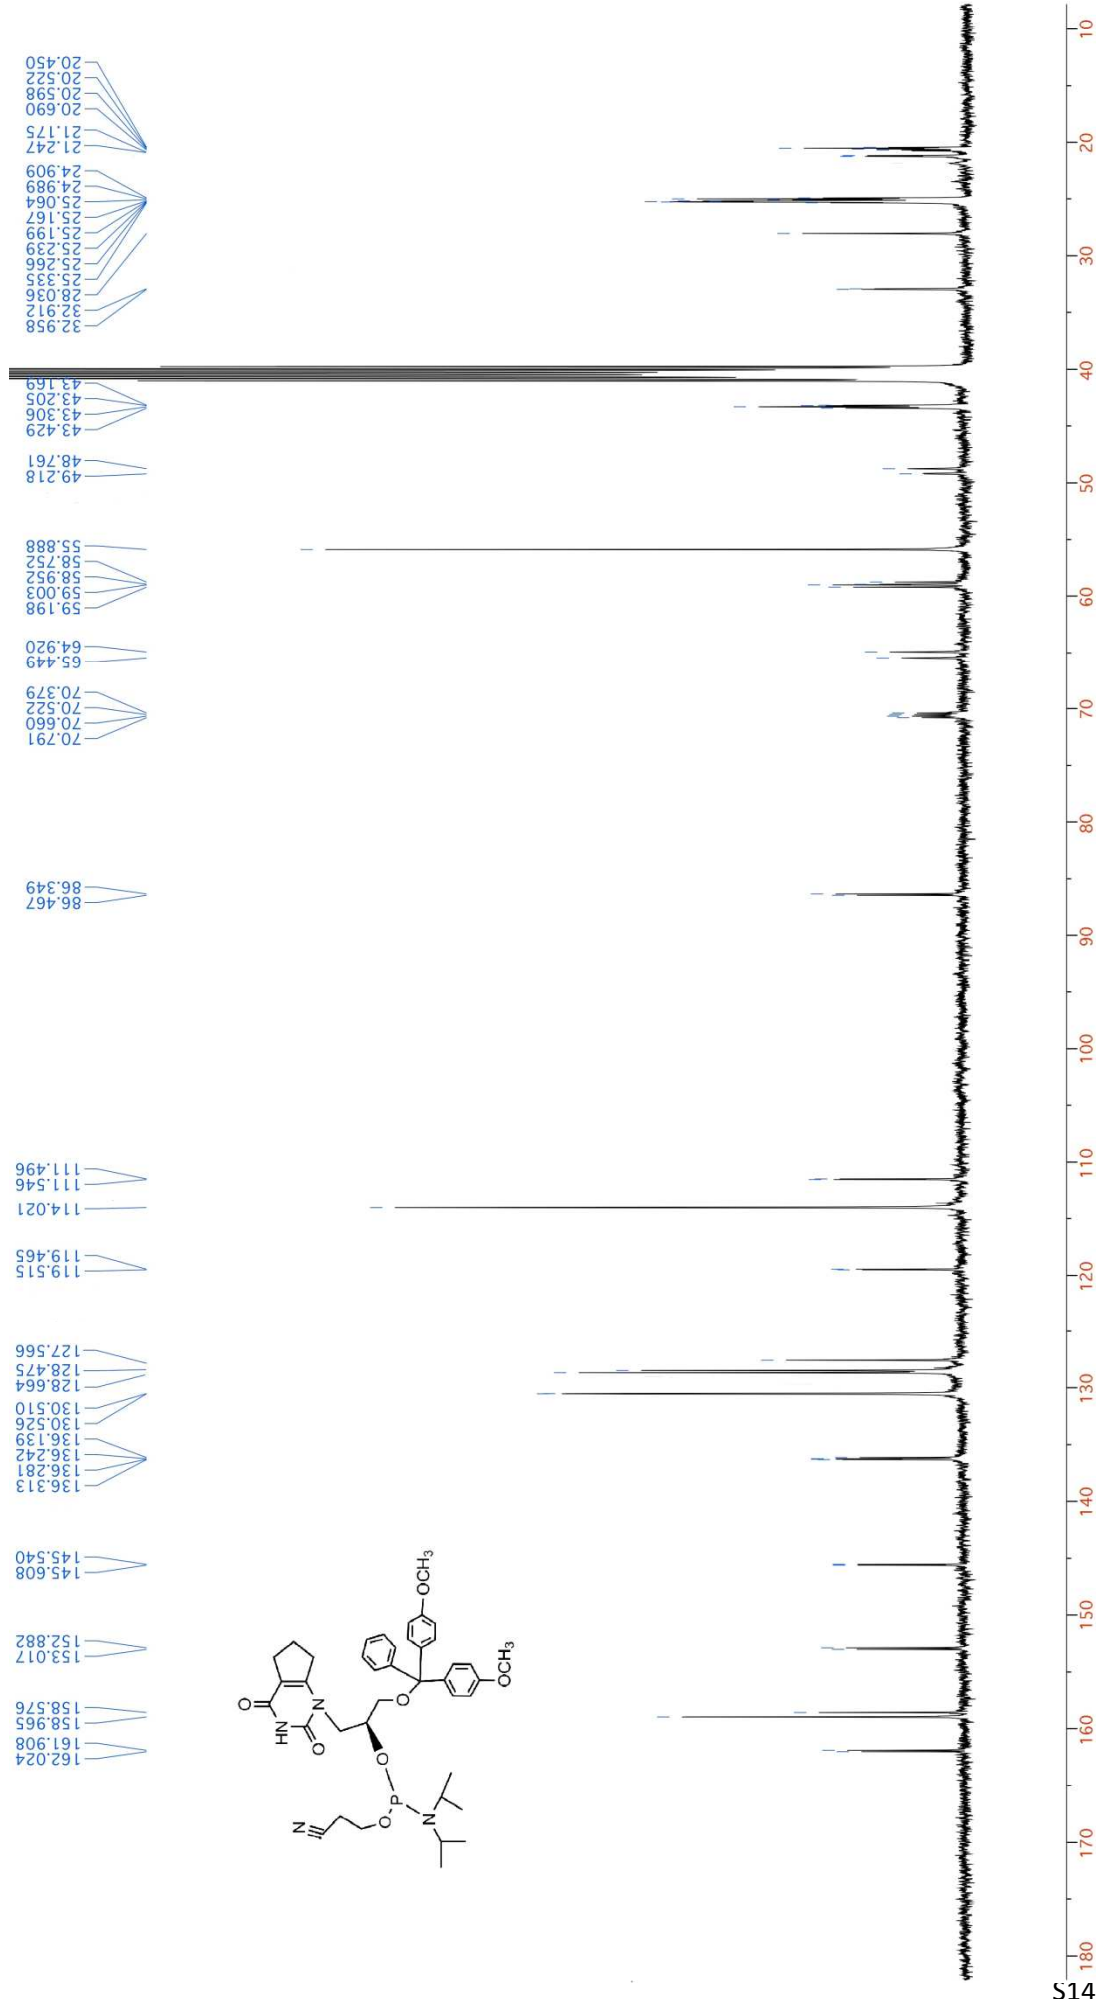

Figure S11: <sup>13</sup>C NMR 5b (DMSO-D6, 100MHz)

Figure S12:  $^3\text{P}$  NMR 5a (DMSO-D6, 202 MHz)

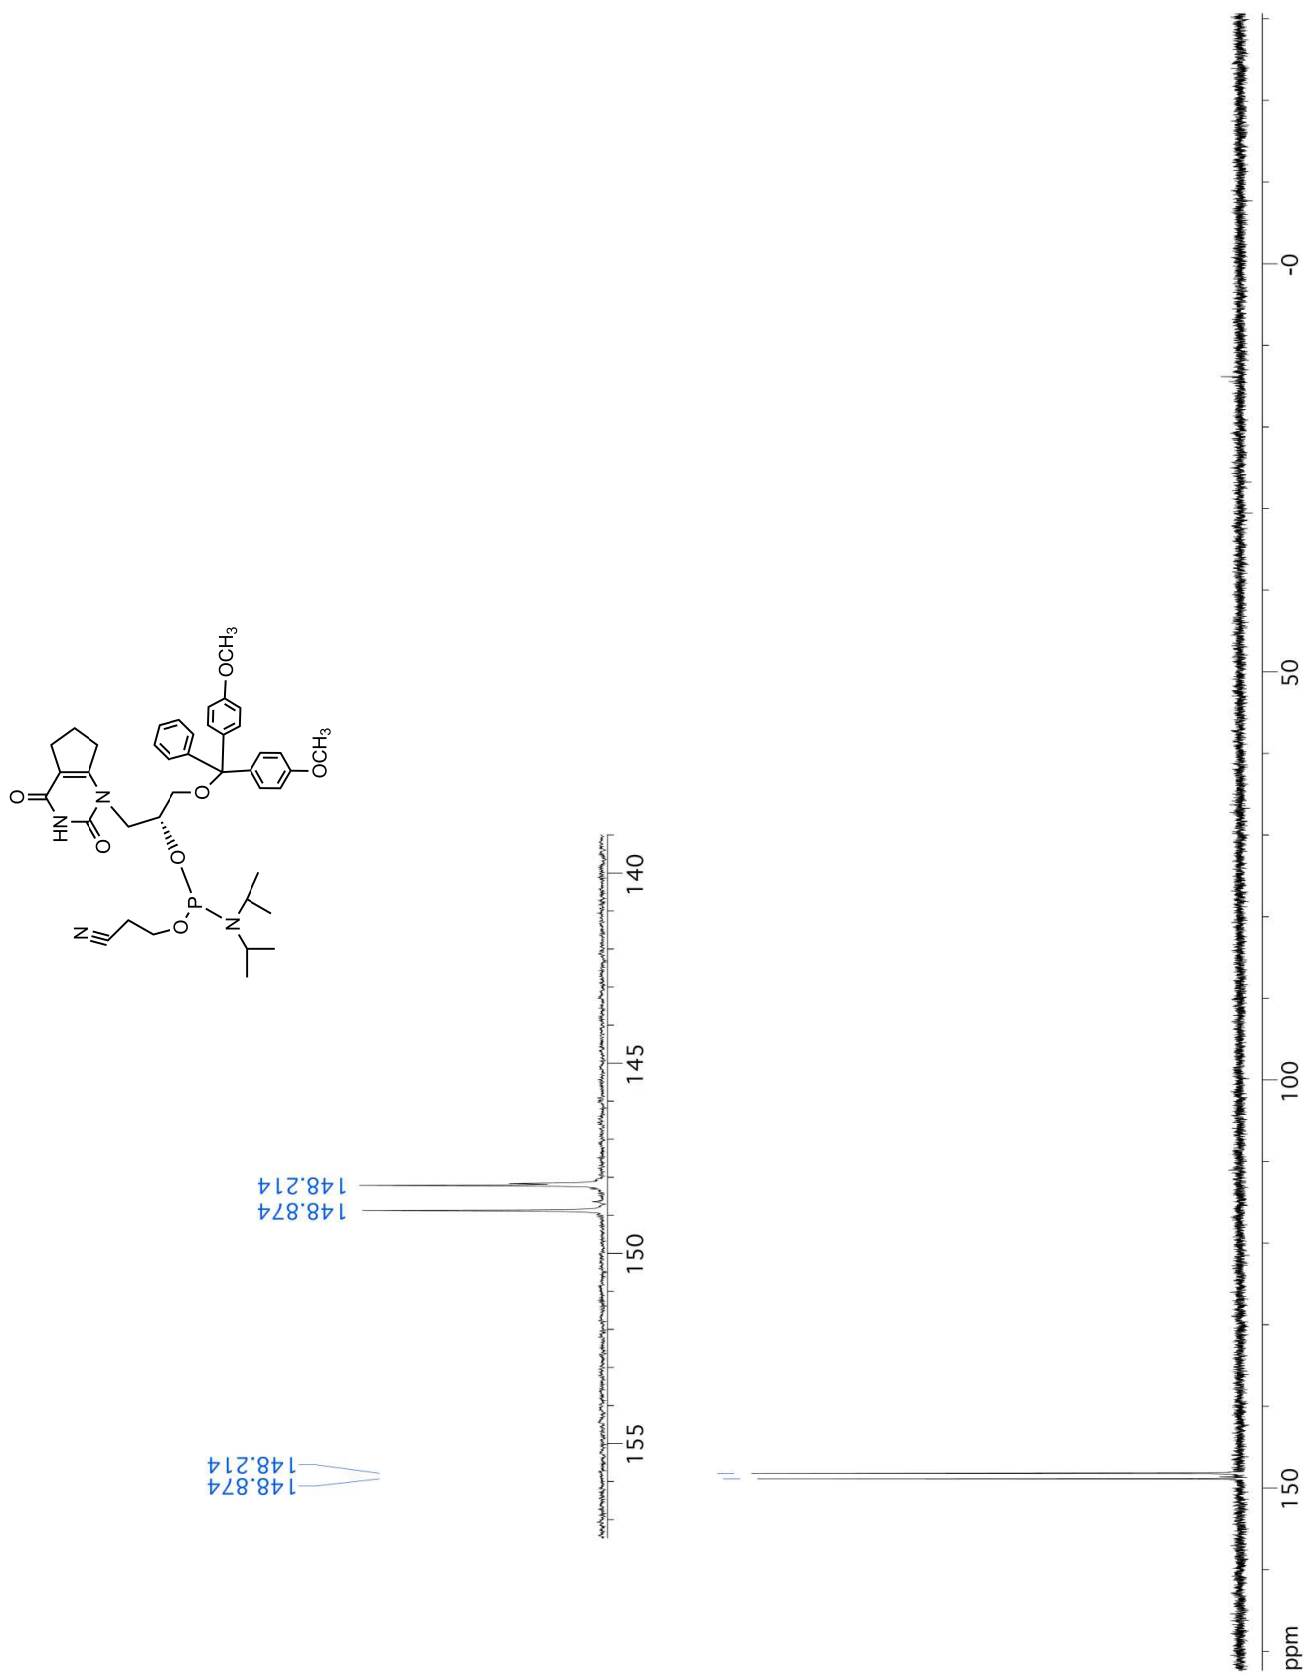

Figure S13:  $^3\text{P}$  NMR 5b (DMSO-D<sub>6</sub>, 202 MHz)

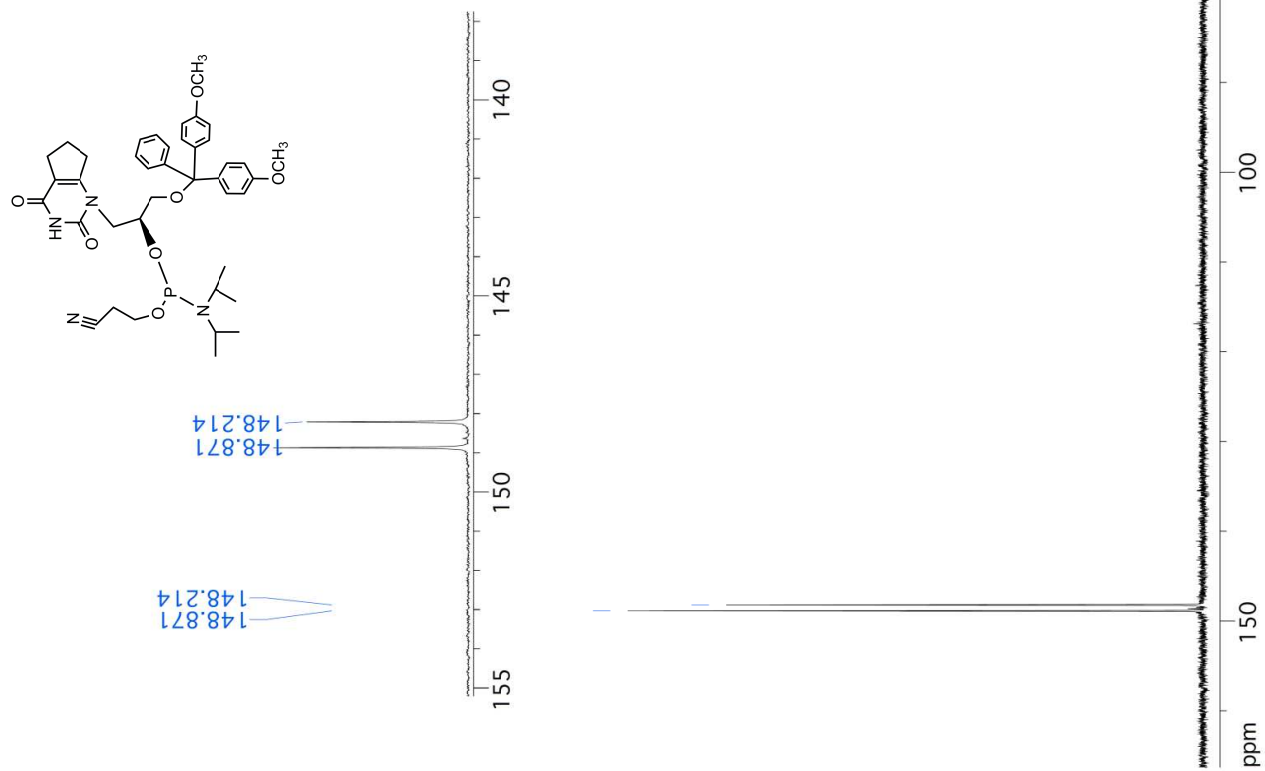



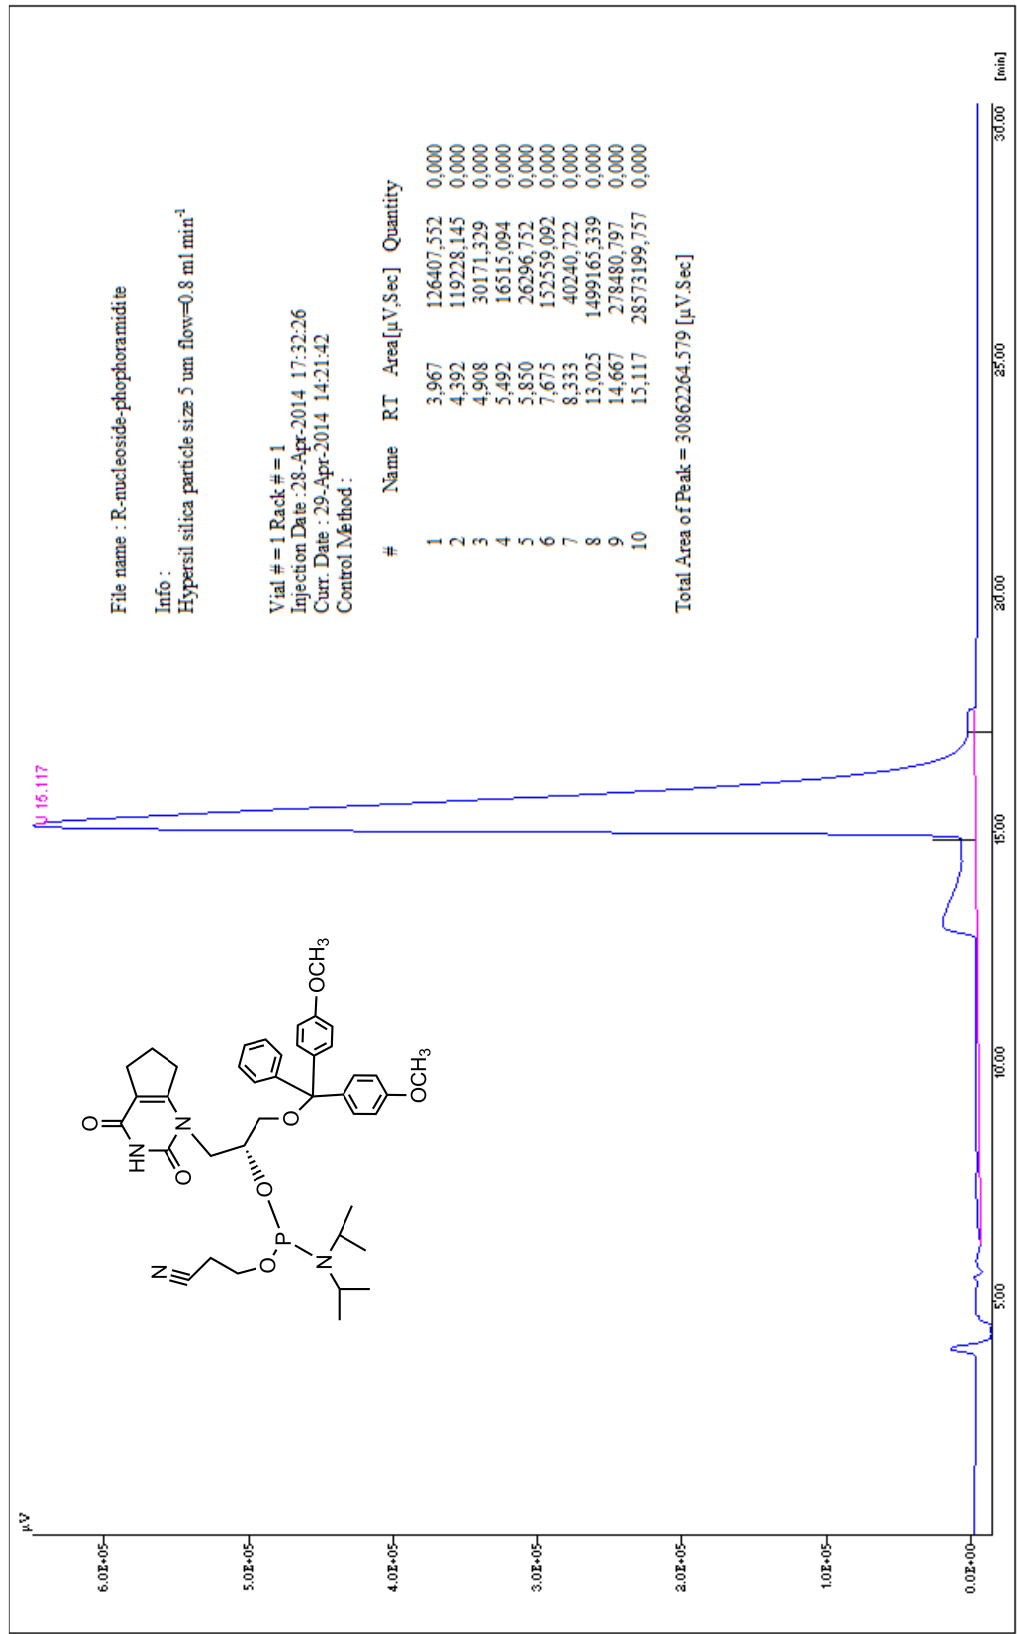

**Figure S14** HPLC chromatogram of the mixture of conversion of 4a in **5a**. Hipersil silica column particle size 5 um; eluent: (50:50; V/V) n-Hexane-Ethyl Acetate.

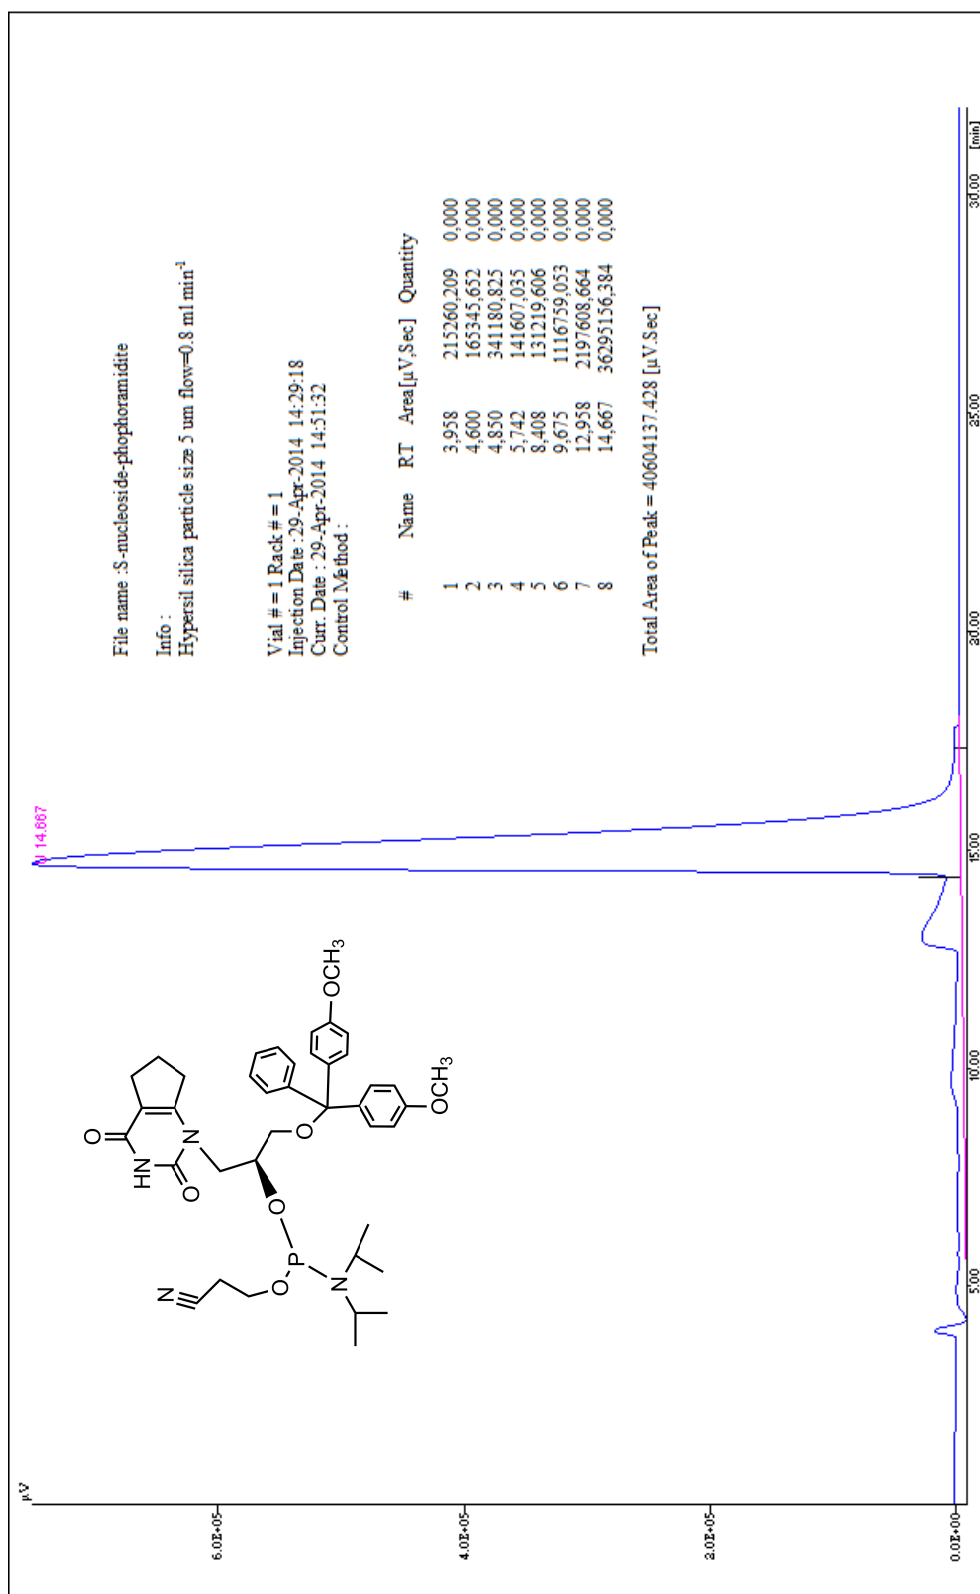

**Figure S15:** HPLC chromatogram of the mixture of conversion of 4b in **5b**. Hipersil silica column particle size 5 um; eluent:(50:50; V/V) n-Hexane-Ethyl Acetate.

NUCRS #98-124 RT: 2.43-3.08 AV: 27 NL: 3.38E6  
T: FTMS + p ESI Full ms [200.00-1500.00]

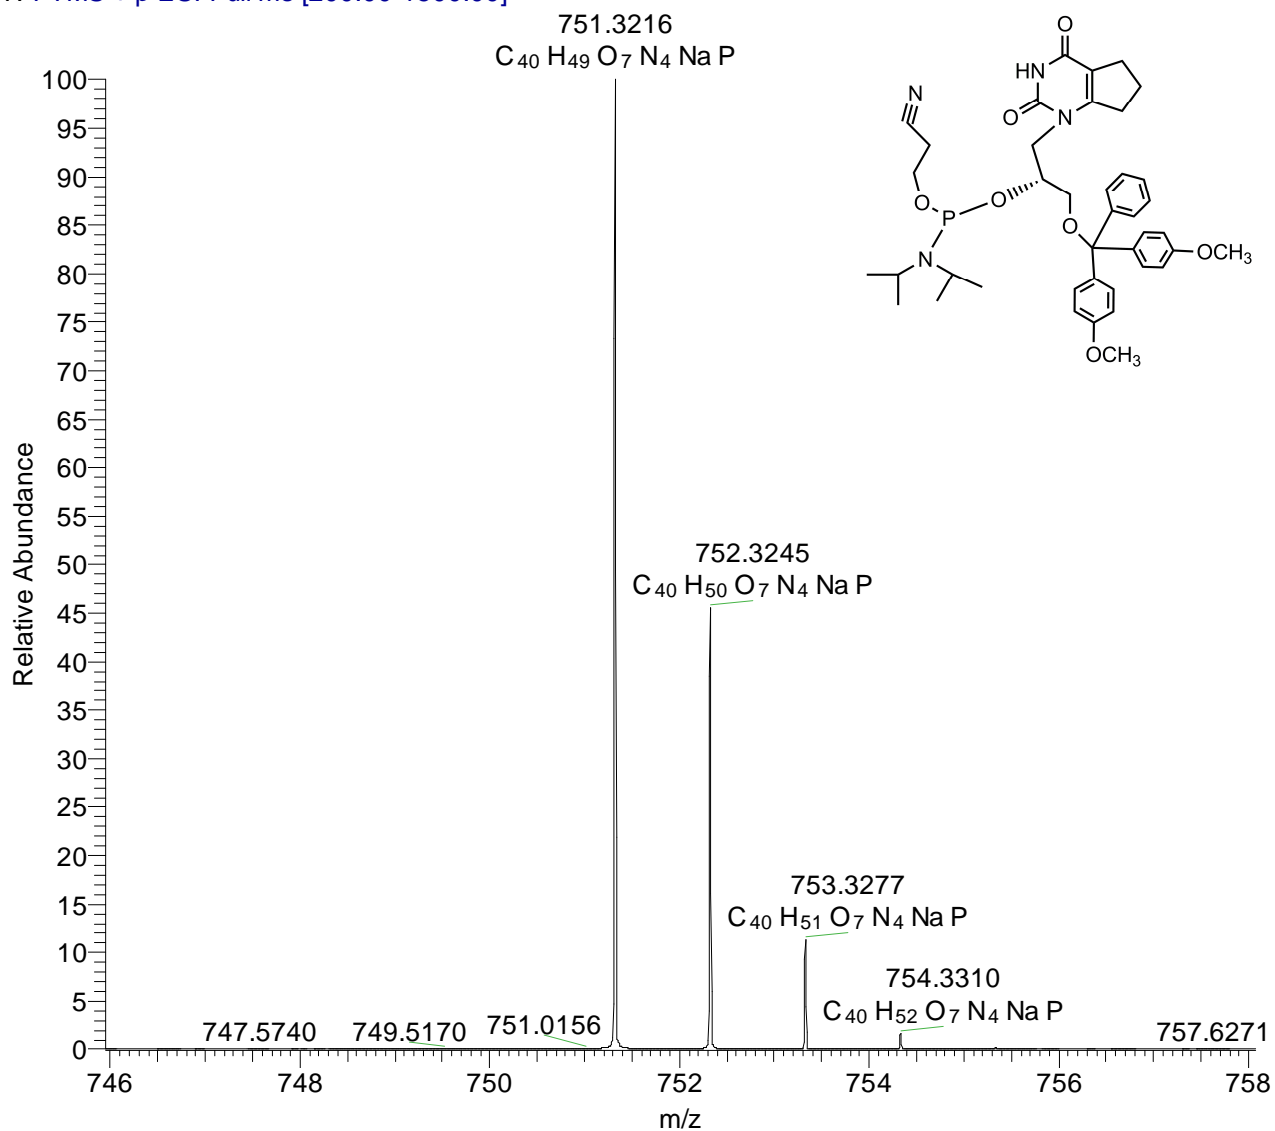

**Figure S16:** High resolution ESI-MS mass spectrum of **5a** was performed on a Thermo LTQ Orbitrap XL mass spectrometer (positive mode). The spectra was recorded by infusion into the ESI source using MeOH as the solvent.

NUCRS #198-222 RT: 4.93-5.53 AV: 25 NL: 2.34E6  
T: FTMS + p ESI Full ms [200.00-1500.00]

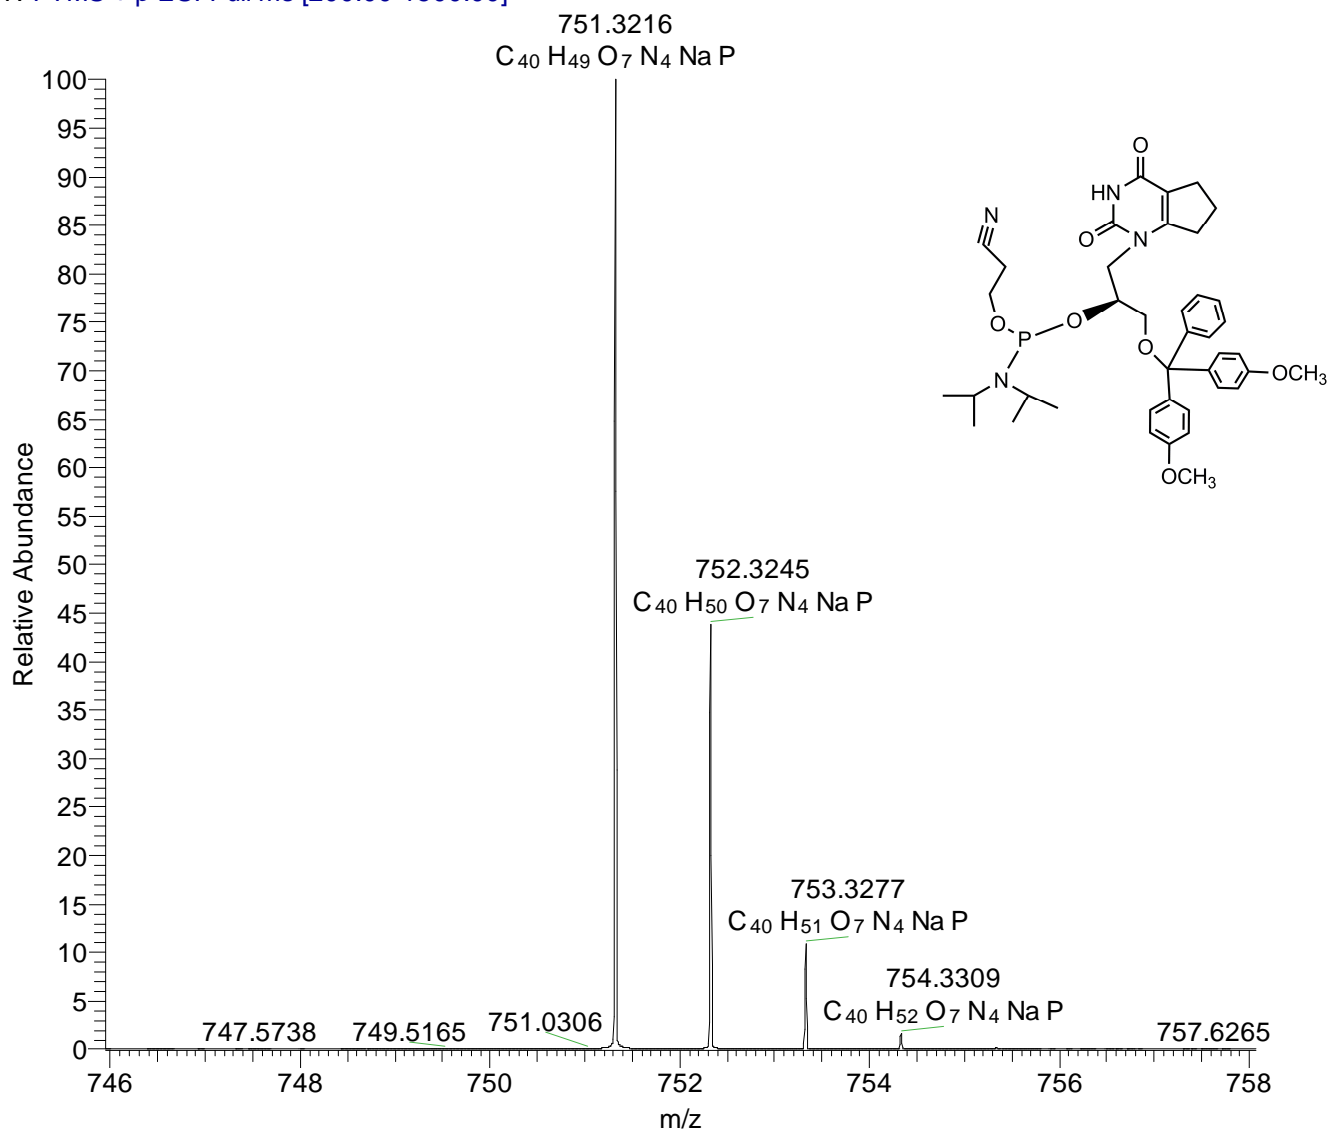

**Figure S17:** High resolution ESI-MS mass spectrum of **5b** was performed on a Thermo LTQ Orbitrap XL mass spectrometer (positive mode). The spectra was recorded by infusion into the ESI source using MeOH as the solvent.
